# Supplementary material for: High quantum yield and pH sensitive fluorescence dyes based on coumarin derivatives: fluorescence characteristics and theoretical study
Source: Royal Society of Chemistry journal article supplement (doi:10.1039/c6ra05996a), 2016-01-01

## Supporting Information

### High Quantum Yield and pH sensitive Fluorescence dyes Based on Coumarin Derivatives : Fluorescence Characteristics and Theoretical Study

*Chao-jun Hua, Kan Zhang, Ming Xin, Ting Ying, Jian-rong Gao, Jian-hong Jia, Yu-jin Li\**

College of Chemical Engineering , Zhejiang University of Technology, Hangzhou  
310014, People's Republic of China.

E-mail: lyjzjut@zjut.edu.cn

#### Table of Contents

|                                                                       |            |
|-----------------------------------------------------------------------|------------|
| <b>1. General Information.....</b>                                    | <b>i</b>   |
| <b>2.General Procedure for the Synthesis of 4-aminocoumarins.....</b> | <b>ii</b>  |
| <b>3. General Procedure for the Synthesis of compound 4a-4e.....</b>  | <b>ii</b>  |
| <b>4. Spectroscopic Data for Products.....</b>                        | <b>iii</b> |
| <b>5. Copies of Product NMR Spectra.....</b>                          | <b>vi</b>  |

#### **1. General Information.**

All of the chemicals used in the current study were purchased from commercial vendors and used as received without further

purification, unless otherwise noted. All solvents were purified and dried using standard methods prior to use. Nuclear magnetic resonance ( $^1\text{H}$ ,  $^{13}\text{C}$ ) spectra were recorded on a Bruker AM 500 spectrometer with chemical shifts reported as ppm at 500, 125 MHz, respectively, (in DMSO and TMS as the internal standard). Fluorescence spectra were obtained with a F-7000 Fluorescence Spectrophotometer in a solution of  $1.0 \times 10^{-5}$  mol/L. UV-Vis absorption spectra were measured on a UV-2550. The absorption and emission studies at different pH were all measured in DMSO-water mixture (DMSO:H<sub>2</sub>O=9:1).

## 2. General Procedure for the Synthesis of 4-aminocoumarin<sup>a</sup>.

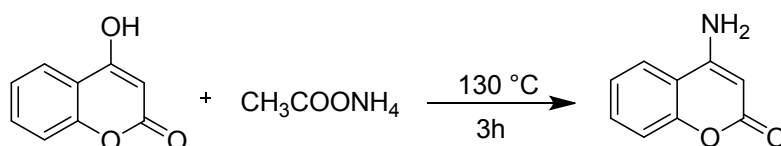

A mixture of well powdered 4-hydroxycoumarin (1.07 g, 0.0066 mol) and ammonium acetate (7.87 g, 0.100 mol) was melted in an oil bath (max.  $130\text{ }^\circ\text{C}$ ) and stirred for 3 h. After cooling to ambient temperature, water was added and the crude product was isolated as yellow crystals by simple filtration. 4-aminocoumarin was obtained by recrystallized from EtOH and water as yellow crystals (0.98 g, 92.2%).

## General Procedure for the Synthesis of compound 4a-4e<sup>b</sup>.

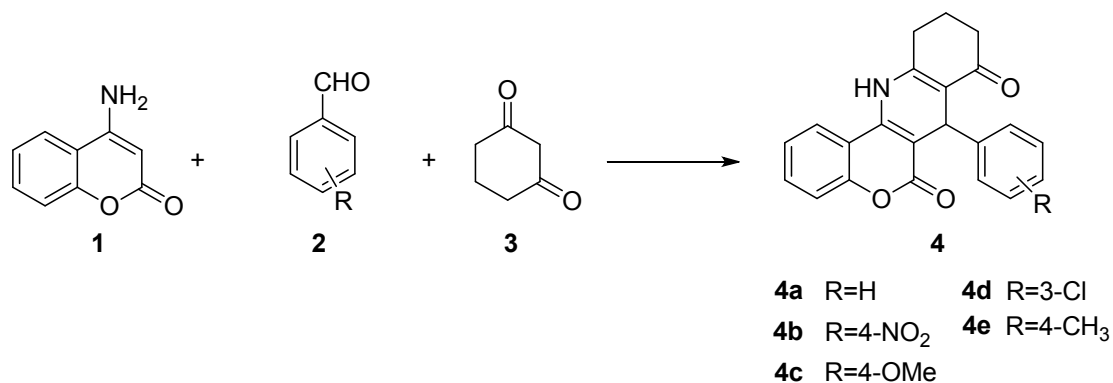

A mixture of benzaldehyde (0.106 g, 1.0 mmol), 1,3-cyclohexanedione (0.112 g, 1.0 mmol) and 4-aminocoumarin(0.161 g, 1.0 mmol) in acetic acid (6 mL) was stirred for 2-3 h at 110°C and completed reaction by TLC detected. The mixture was cooled to room temperature and the crude was separated by filter. Then, the crude product was washed with H<sub>2</sub>O (20 mL) and recrystallized from DMSO to give product **4a** (0.295 g, 86.3%) as light yellow solid.

**Reference:**

- (a) Ahmed, N.; Babu, B. V.; Singh, S.; Mitrasinovic, P. M. *Heterocycles* 2012, 85, 1629.
- (b) Miri, R.; Motamedi, R.; Rezaei, M. R.; Firuzi, O.; Javidnia, A.; Shafiee, A. *Arch Pharm* 2011, 344, 111.

**3. Spectroscopic Data for Products**

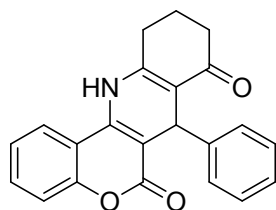

**7-phenyl-9,10,11,12-tetrahydro-6H-chromeno[4,3-b]quinoline-6,8(7H)-dione (4a)**

Light yellow solid. Yield 86%. Mp 296-298 °C. <sup>1</sup>H-NMR (DMSO, 500 MHz) δ (ppm): 9.76 (s, 1H), 8.32 (d, *J* = 8.0 Hz, 1H), 7.62-7.65 (m, 1H), 7.44 (t, *J* = 7.5 Hz, 1H), 7.38 (d, *J* = 8.3 Hz, 1H), 7.11-7.24 (m, 4H), 7.09 (t, *J* = 7.2 Hz, 1H), 4.99 (s, 1H), 2.82-2.87 (m, 1H), 2.67-2.73 (m, 1H), 2.24-2.32 (m, 2H), 1.98-2.02 (m, 1H), 1.87-1.88 (m, 1H). <sup>13</sup>C NMR (DMSO, 125 MHz) δ (ppm): 194.93 (1C), 160.33 (1C), 152.02 (1C), 151.67 (1C), 145.90 (1C), 142.05 (1C), 131.92 (1C), 128.02 (2C), 127.65 (2C), 126.18 (1C), 123.97 (1C), 122.93 (1C), 116.85 (1C), 113.03 (1C), 111.86 (1C), 101.78 (1C), 36.66 (1C), 34.12 (1C), 26.37 (1C), 20.71 (1C).

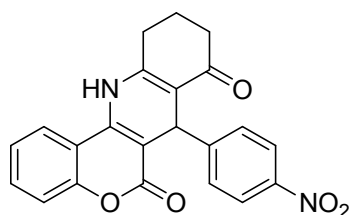

**7-(4-nitrophenyl)-9,10,11,12-tetrahydro-6H-chromeno[4,3-b]quinoline-6,8(7H)-dione(4b)**

Light yellow solid. Yield 90%. Mp 260-262 °C. <sup>1</sup>H-NMR (DMSO,500 MHz) δ (ppm): 9.88 (s, 1H), 8.34-8.36 (m, 1H), 8.08-8.10 (m, 2H), 7.65-7.68 (m, 1H), 7.51-7.54 (m, 2H), 7.45-7.48 (m, 1H), 7.40 (t, *J* = 7.7 Hz, 1H), 5.11 (s, 1H), 2.87 (t, *J*=9.4Hz, 1H), 2.73 (t, *J* = 3.9 Hz, 1H), 2.27-2.33 (m, 2H), 1.98-2.02 (m, 1H), 1.88 (s, 1H). <sup>13</sup>C NMR (DMSO, 125 MHz) δ (ppm): 194.89 (1C), 160.21 (1C), 153.12 (1C), 152.31 (1C), 152.14 (1C), 145.94 (1C), 142.60 (1C), 132.22 (1C), 129.10 (2C), 124.06 (1C), 123.26 (2C), 123.12 (1C), 116.92 (1C), 112.83 (1C), 110.97 (1C), 100.63 (1C), 36.50 (1C), 34.96 (1C), 26.38 (1C), 20.61 (1C).

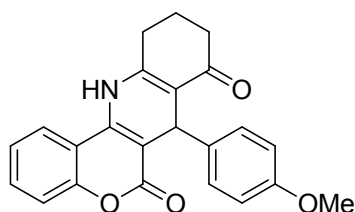

**7-(4-methoxyphenyl)-9,10,11,12-tetrahydro-6H-chromeno[4,3-b]quinoline-6,8(7H)-dione(4c)**

Light yellow solid. Yield 88%. Mp 276–278°C. <sup>1</sup>H-NMR (DMSO,500 MHz) δ (ppm): 9.72 (s, 1H), 8.30-8.32 (m, 1H), 7.61-7.65 (m, 1H), 7.42-7.45 (m, 1H), 7.37 (t, *J* = 8.2 Hz, 1H), 7.13-7.14 (m, 2H), 6.75-6.77 (m, 2H), 4.93 (s, 1H), 3.66 (s, 3H), 2.81-2.86 (m, 1H), 2.65-2.72 (m, 1H), 2.24-2.32 (m, 2H), 1.98-2.03 (m, 1H), 1.84-1.90 (m, 1H). <sup>13</sup>C NMR (DMSO, 125 MHz) δ (ppm): 194.90 (1C), 160.32 (1C), 151.98 (1C), 151.32 (1C), 141.74 (1C), 138.23 (1C), 131.80 (1C), 128.59 (3C), 123.91 (1C), 122.86 (1C), 116.79 (1C), 113.38 (2C), 113.05 (1C), 112.09 (1C), 102.06 (1C), 55.99 (1C), 36.67 (1C), 33.19 (1C), 26.33 (1C), 20.74 (1C).

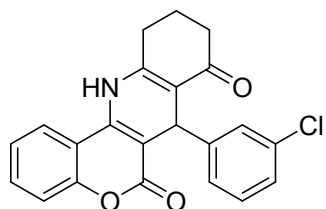

**7-(3-chlorophenyl)-9,10,11,12-tetrahydro-6H-chromeno[4,3-b]quinoline-6,8(7H)-dione (4d)**

Light yellow solid. Yield 82% . Mp 267–269 °C. <sup>1</sup>H-NMR (DMSO,500 MHz) δ (ppm): 9.82(s, 1H), 8.33-8.35 (m, 1H), 7.46 (s, 1H), 7.39-7.41 (m, 1H), 7.36-7.38 (m,

3H), 7.28(m, 1H), 5.26 (s, 1H), 2.85-2.88 (m, 1H), 2.68-2.72 (m, 1H), 2.29-2.33(m, 2H), 2.00-2.02 (m, 1H), 1.83 (s, 1H). <sup>13</sup>C NMR (DMSO, 125 MHz) δ (ppm): 194.96 (1C), 160.30 (1C), 152.11 (1C), 149.12 (1C), 140.13 (1C), 133.39 (1C), 132.14 (1C), 131.21 (1C), 128.34 (1C), 126.83 (1C), 123.95 (1C), 121.08 (1C), 120.23 (1C), 116.82 (1C), 114.08 (1C), 113.04 (1C), 111.01 (1C), 101.09 (1C), 36.61 (1C), 33.93 (1C), 26.37 (1C), 20.65 (1C).

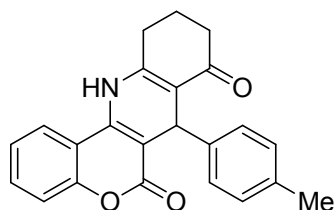

**7-(p-tolyl)-9,10,11,12-tetrahydro-6H-chromeno[4,3-b]quinoline-6,8(7H)  
-dione(4e)**

Light yellow solid. Yield 83%. Mp 304–305°C. <sup>1</sup>H-NMR (DMSO, 500 MHz) δ (ppm) : 9.72 (s, 1H), 8.30-8.32 (m, 1H), 7.61-7.63 (m, 1H), 7.41-7.45 (m, 1H), 7.36 (t, *J* = 8.2 Hz, 1H), 7.12 (d, *J* = 8.05 Hz, 2H), 7.00 (d, *J* = 7.95 Hz, 2H), 4.95 (s, 1H), 2.82-2.86 (m, 1H), 2.69-2.71 (m, 1H), 2.18-2.31 (m, 2H), 2.19 (s, 3H), 2.0-2.02 (m, 1H), 1.82-1.89 (m, 1H). <sup>13</sup>C NMR (DMSO, 125 MHz) δ (ppm): 194.86 (1C), 160.28 (1C), 151.99 (1C), 151.40 (1C), 143.04 (1C), 141.87 (1C), 135.15 (1C), 131.81 (1C), 128.54 (2C), 127.52 (2C), 123.90 (1C), 122.87 (1C), 116.79 (1C), 113.02 (1C), 112.00 (1C), 101.91 (1C), 36.66 (1C), 33.66 (1C), 26.34 (1C), 20.72 (1C), 20.51 (1C).

#### 4. Copies of Product NMR Spectra

##### 4a <sup>1</sup>H NMR (500 MHz, DMSO)

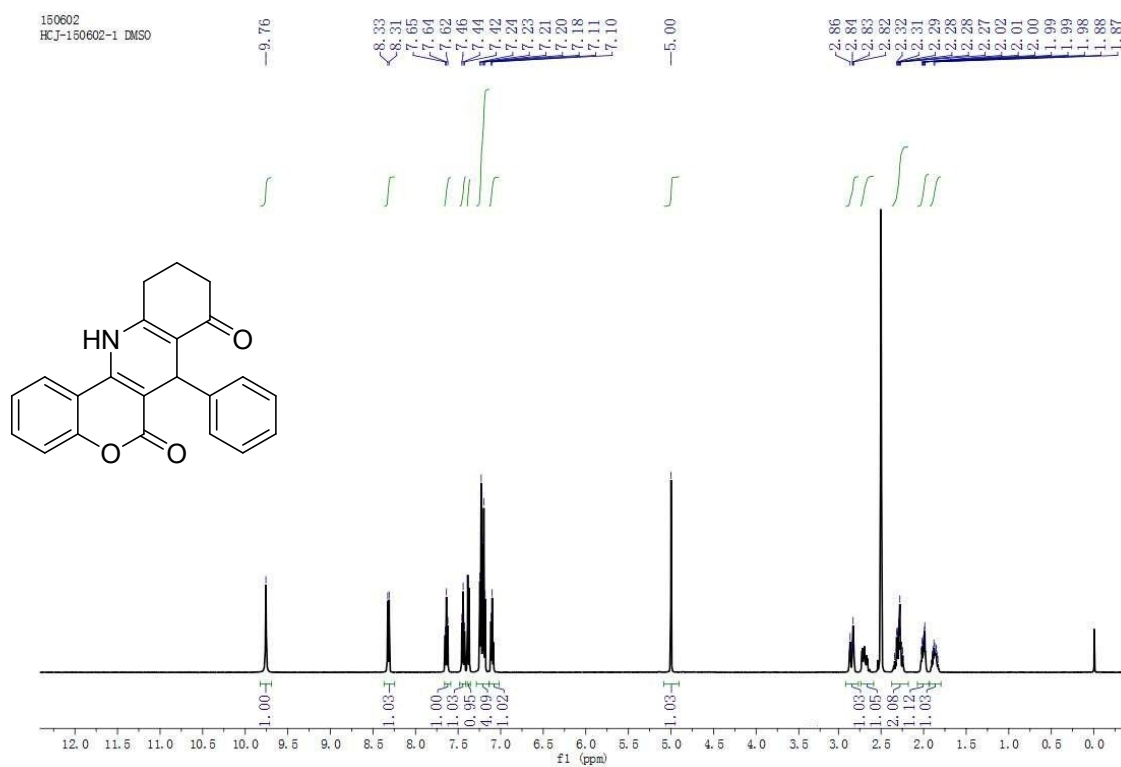

##### 4a <sup>13</sup>C NMR (125MHz, DMSO)

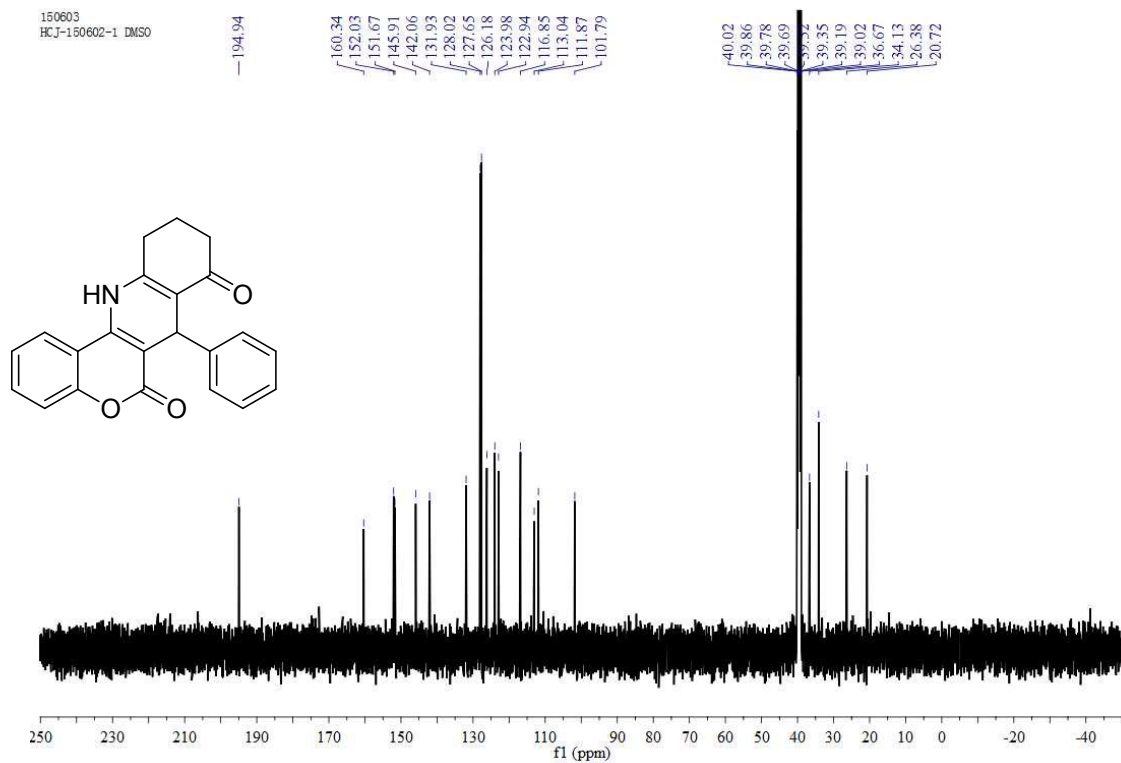

**4b**  $^1\text{H}$  NMR (500 MHz, DMSO)

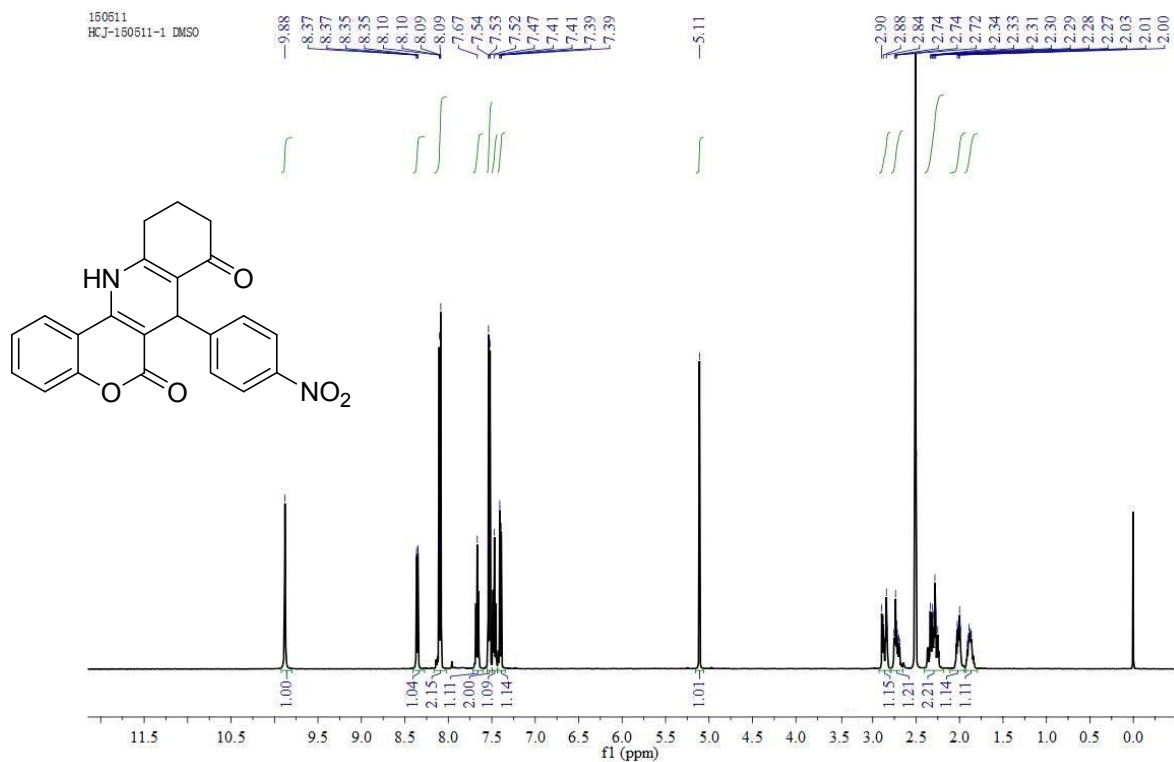

**4b**  $^{13}\text{C}$  NMR (125MHz, DMSO)

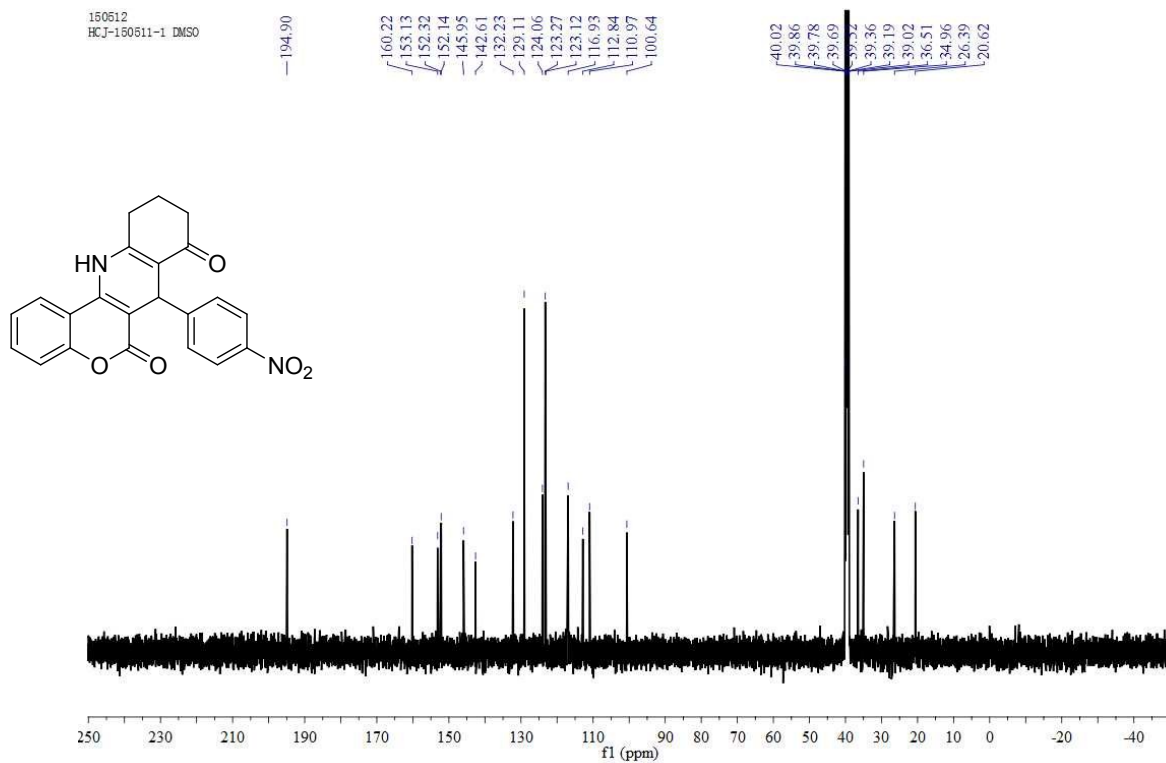

4c <sup>1</sup>H NMR (500 MHz, DMSO)

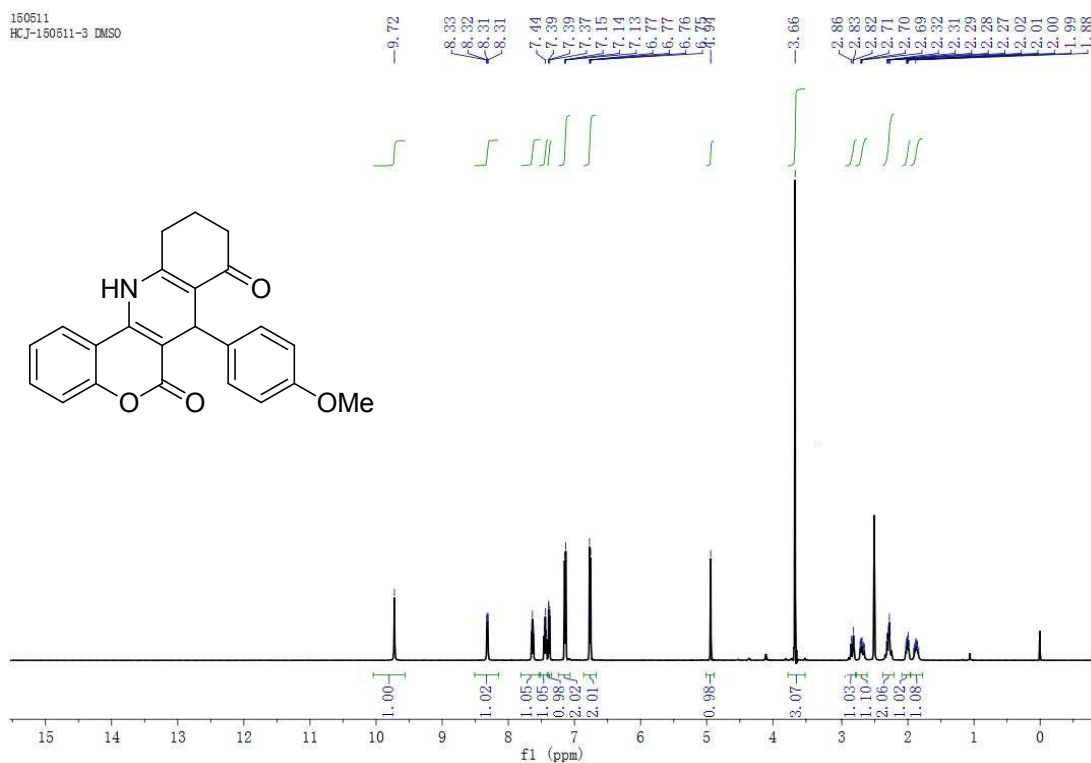

4c <sup>13</sup>C NMR (125MHz, DMSO)



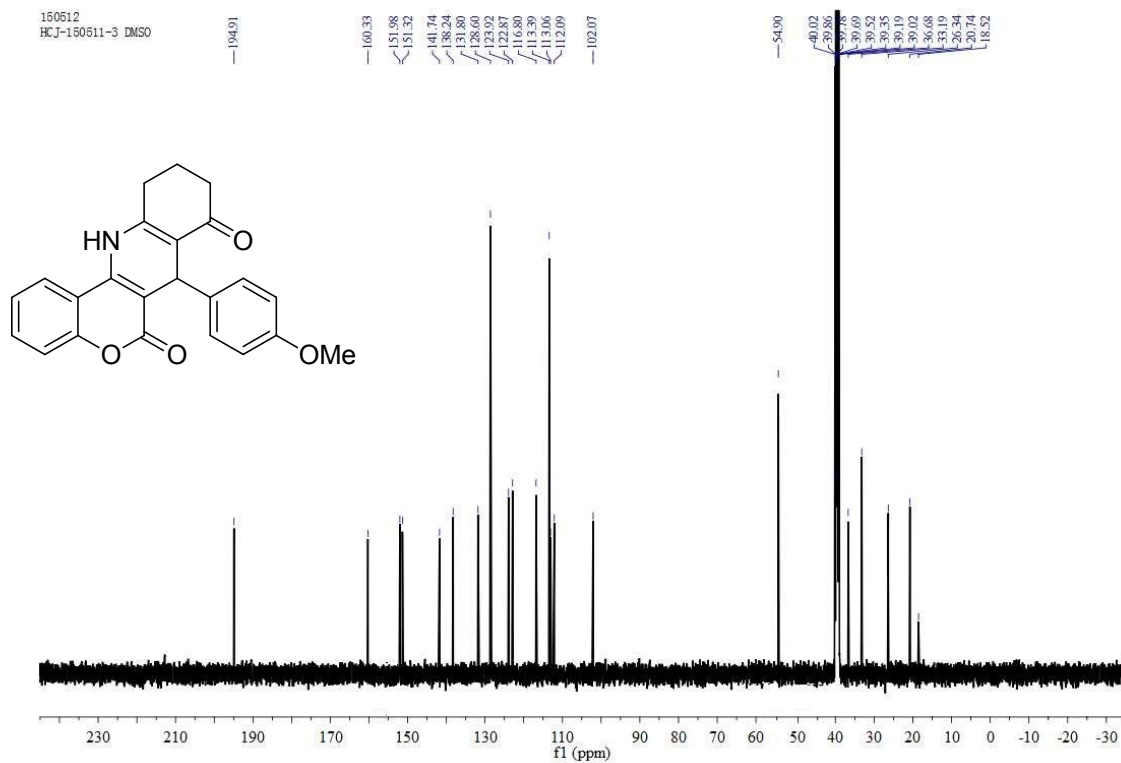

**4d**  $^1\text{H}$  NMR (500 MHz, DMSO)

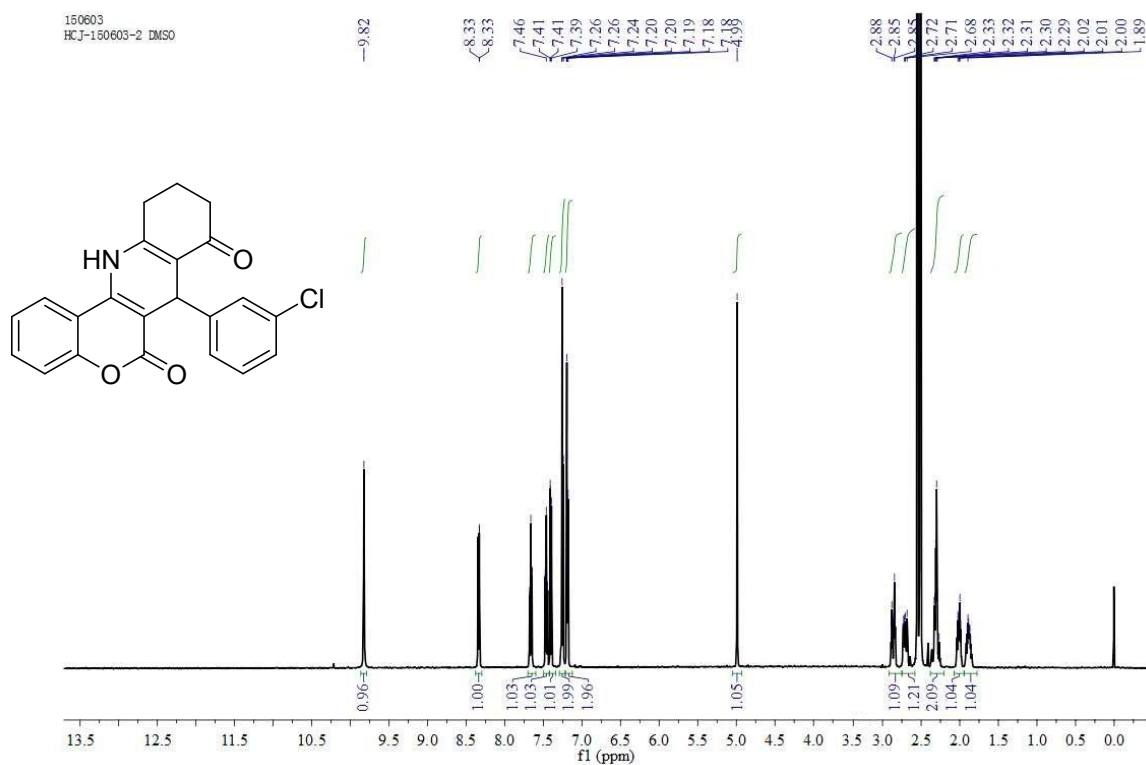

**4d**  $^{13}\text{C}$  NMR (125MHz, DMSO)

150604  
HCJ-150603-2 DMSO

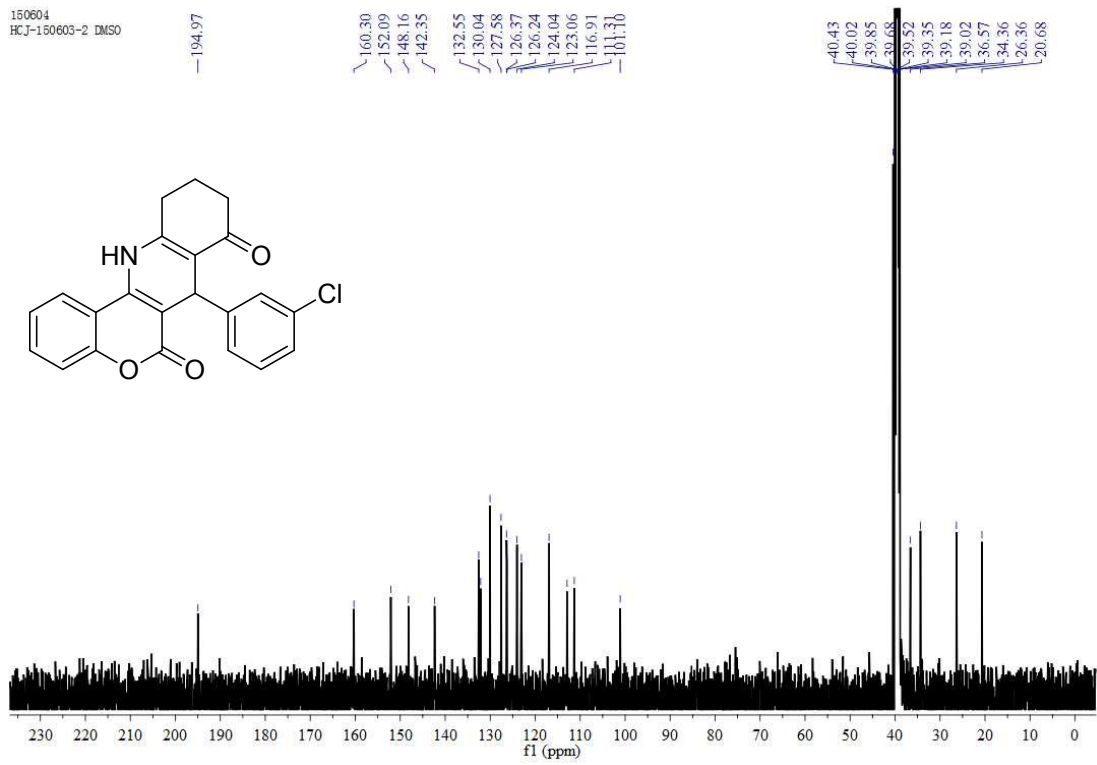

4e <sup>1</sup>H NMR (500 MHz, DMSO)

150611  
HCJ-150611-10 DMSO

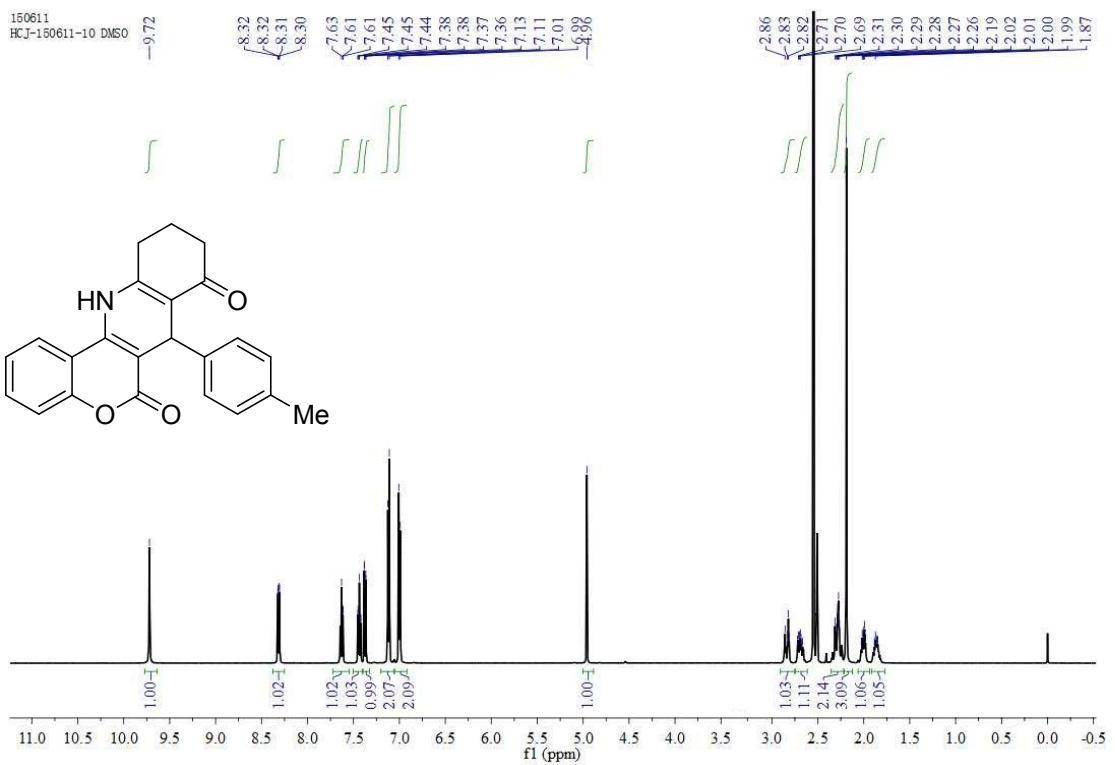

4e <sup>13</sup>C NMR (125MHz, DMSO)

150612  
HCJ-150611-10 DMSO

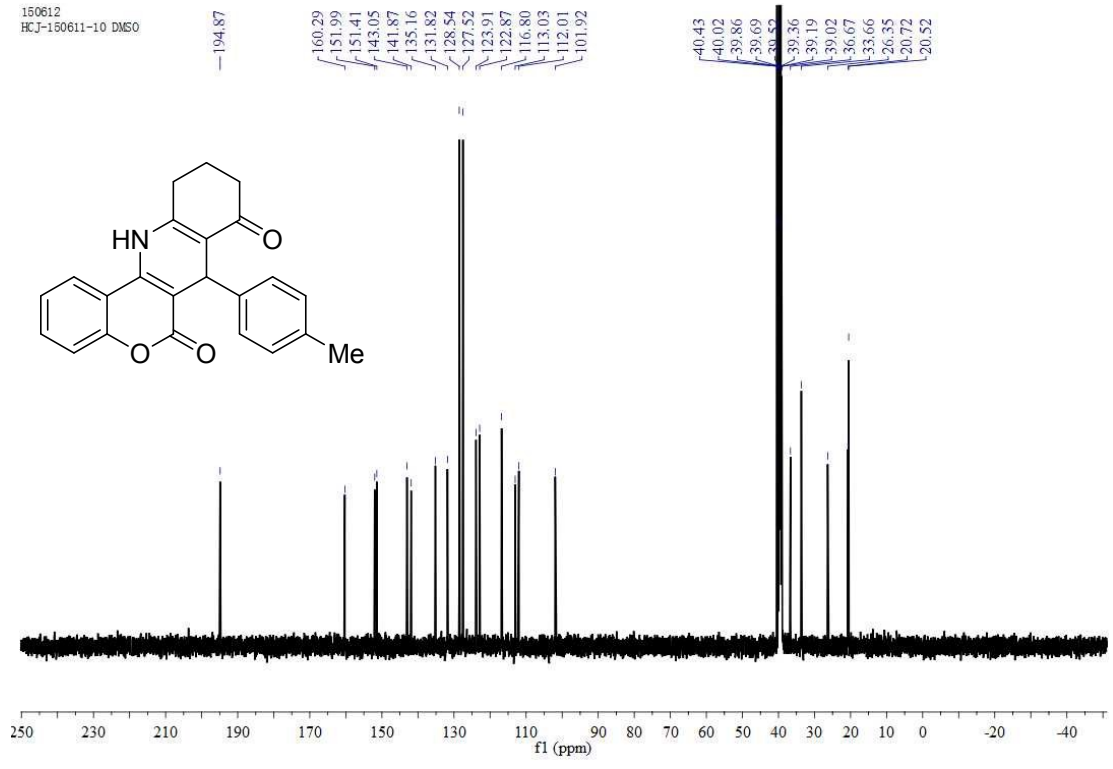

Supplement: c6ra05996a1.pdf [file c6ra05996a1.pdf]
